# Supplementary material
Source: PubMed Central journal article supplement (PMC8059095)
Supplement: mmc1.pdf [file mmc1.pdf]

**Biophysical Journal, Volume 120**

**Supplemental information**

**Sequence effects on internal structure of droplets of associative  
polymers**

**Kulveer Singh and Yitzhak Rabin**

# Supplementary Material: Sequence Effects on Internal Structure of Droplets of Associative Polymers

Kulveer Singh<sup>1,\*</sup> and Yitzhak Rabin<sup>1,†</sup>

<sup>1</sup>*Department of Physics, and Institute of Nanotechnology and Advanced Materials,  
Bar-Ilan University, Ramat Gan 52900, Israel*

(Dated: July 31, 2020)

## I. DROP FORMATION FOR $\epsilon_s = \epsilon_{ns} = 0.8$ AND $r_{ij}^{cut} = 2.5\sigma$

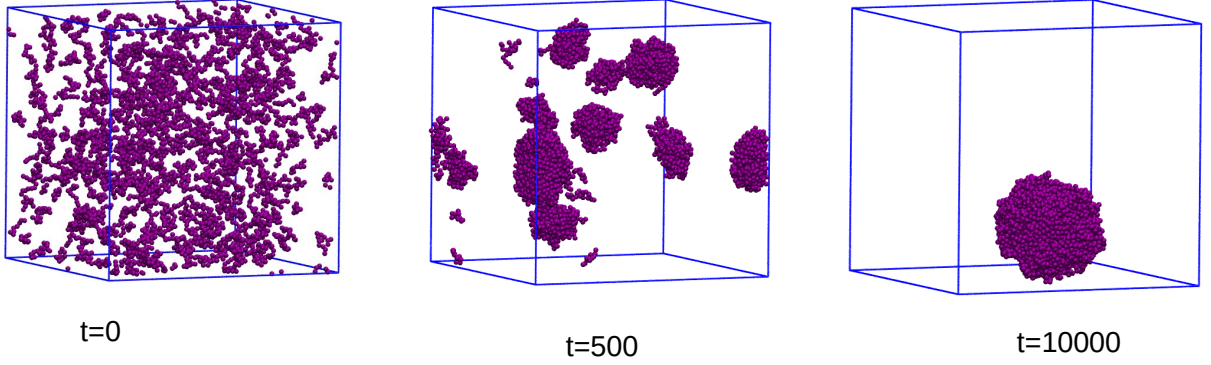

FIG. S 1: Phase separation of polymers without stickers in poor solvent condition for  $\epsilon_s = \epsilon_{ns} = 0.8$

## II. NO DROP FORMATION FOR $\epsilon_s = \epsilon_{ns} = 0.5$ AND $r_{ij}^{cut} = 2.5\sigma$

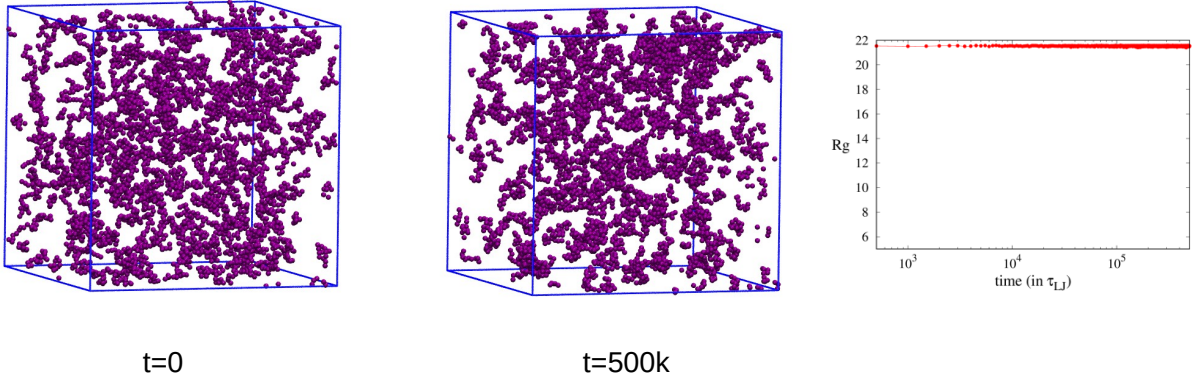

FIG. S 2: Phase separation of polymers does not occurs in poor solvent condition  $\epsilon_s = \epsilon_{ns} = 0.5$ . We evolved the system for very long time ( $t = 500,000$ ) to eliminate the possibility of slow phase separation.

\*Electronic address: kulveersingh85@gmail.com

†Electronic address: yitzhak.rabin@biu.ac.il

### III. TIME EVOLUTION OF $R_g$ FOR 1s6s1, 2s4s2, 3s2s3 AND 4ss4 SEQUENCES.

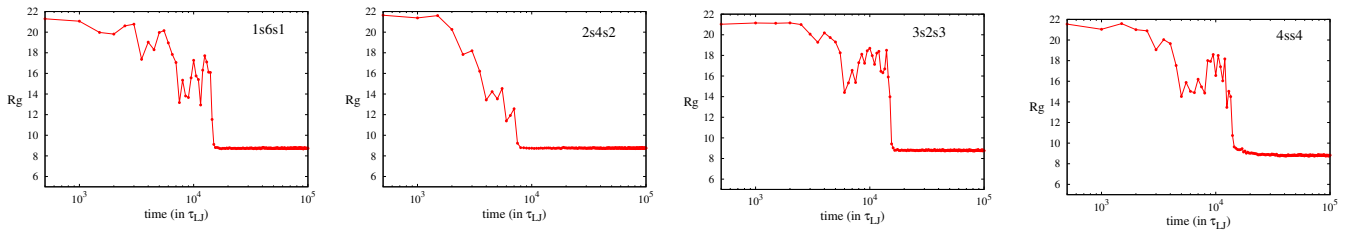

FIG. S 3: Plot of time evolution of radius of gyration of all monomers in the system for different sequences ( $\epsilon_s = 4$ ).

### IV. AVERAGE NUMBER OF CLUSTERS FOR DIFFERENT SEQUENCES

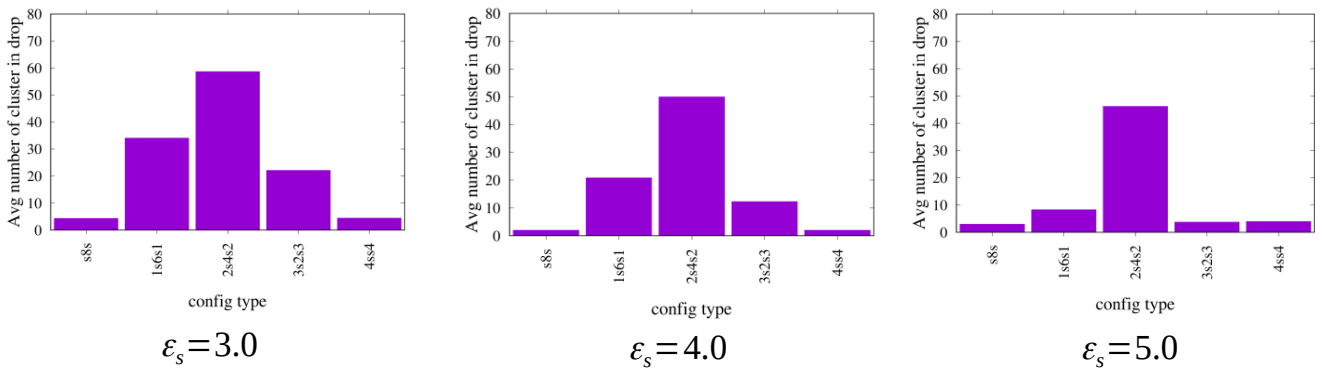

FIG. S 4: Plot shows the average number of clusters in equilibrium state for three different values of  $\epsilon_s$  for all sequences. For all values we obtained non-monotonic change in average cluster size as we go from s8s to 4ss4 sequence.

V. COMPARISON OF CLUSTERS SNAPSHOTS OF DIFFERENT SEQUENCES FOR THREE DIFFERENT  $\epsilon_s$  VALUES

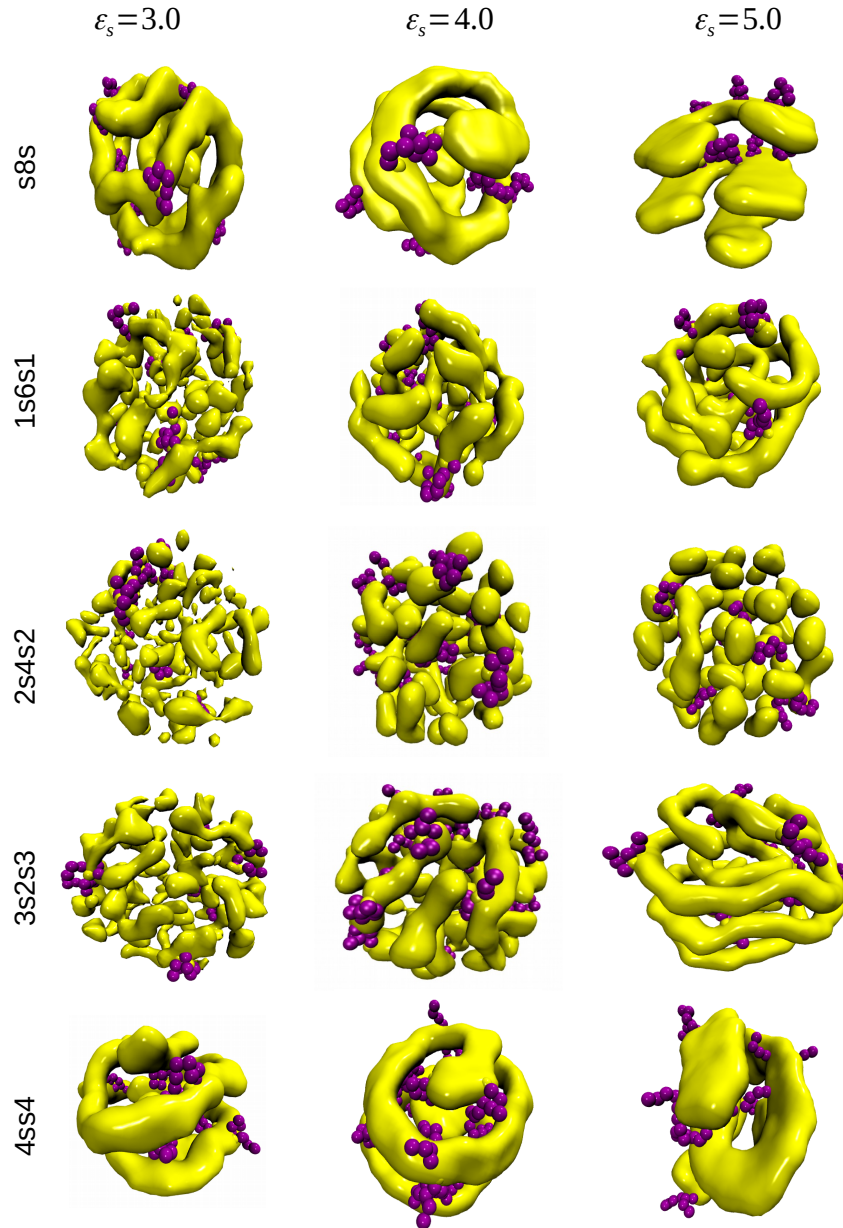

FIG. S 5: Snapshots of sticker clusters in equilibrium state for three different values of  $\epsilon_s$  for all sequences. Shape and size of the clusters changes as  $\epsilon_s$  value is increased. At small  $\epsilon_s$  value, large number of small clusters are present in the system of *1s6s1*, *2s4s2* and *3s2s3* sequences for  $\epsilon_s = 3$  and as  $\epsilon_s$  increases the number of clusters in the system decreases and their size increases. Long and broad fiber-like structures appears for  $\epsilon_s = 5$ . For *s8s* and *4ss4* sequences, the number of clusters remains very small ( $\sim 3 - 4$ ) for all  $\epsilon_s$  but the shape of the clusters changes from cylindrical to planer bilayer as  $\epsilon_s$  is increased.

## VI. $R_{ss}$ DISTRIBUTION IN POOR SOLVENT

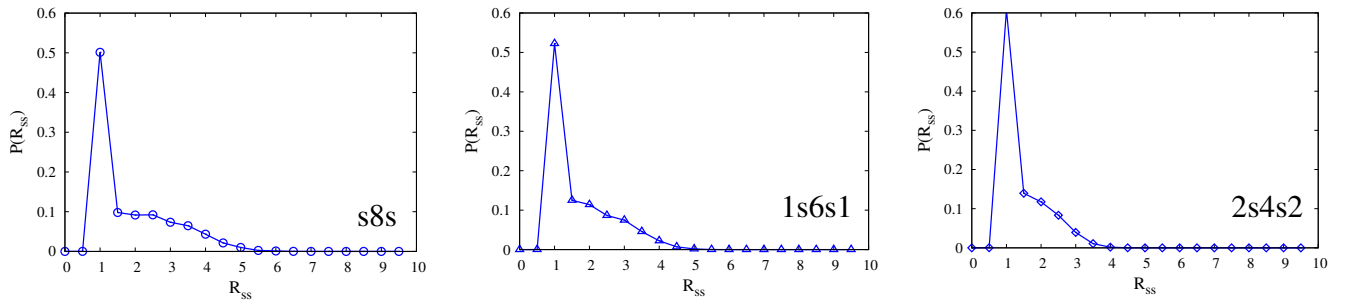

FIG. S 6:  $R_{ss}$  distribution of isolated associating polymers in poor solvent for  $s8s$ ,  $1s6s1$  and  $2s4s2$  sequences ( $\epsilon_s = 4$ ).

## VII. MORPHOLOGY COMPARISON: 10 BEADS POLYMER WITH TWO STICKERS VS ITS REPEAT UNITS (5 BEADS POLYMER WITH ONE STICKER)

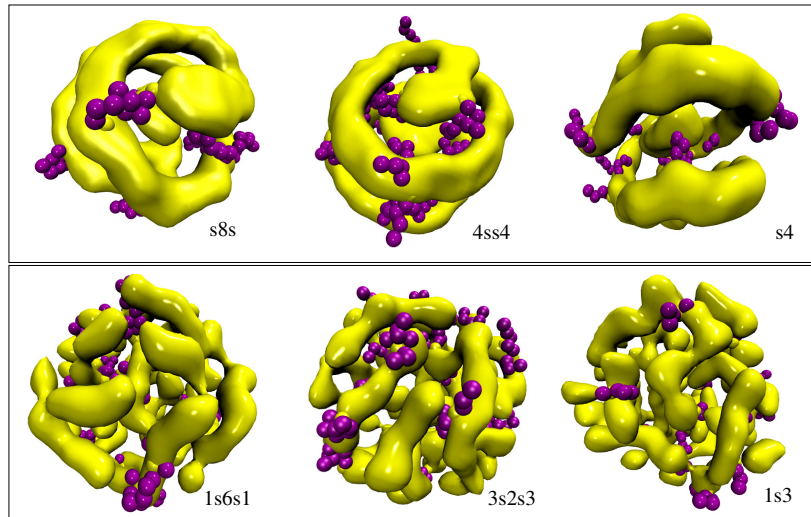

FIG. S 7: Snapshots of sticker clusters inside droplet for different sequences and their repeat units ( $\epsilon_s = 4$ ). Top panel:  $s8s$ ,  $4ss4$  and their repeat unit  $s4$ . Bottom panel:  $1s6s1$ ,  $3s2s3$  and their repeat unit  $1s3$ .
